# Supplementary material for: Risks posed by invasive species to the provision of ecosystem services in Europe
Source: Nat Commun. 2024 Apr 10;15:2631. doi: 10.1038/s41467-024-46818-3 (PMC11006939; doi:10.1038/s41467-024-46818-3)
Supplement: Supplementary file 6 — Supplementary Data 3 [file 41467_2024_46818_MOESM6_ESM.xlsx]

## Sheet: SDM performance
	AUC				MCS
species ID	GLM	GAM	GBM	BART	GLM	GAM	GBM	BART
Aaegy	0.832	0.861	0.848	0.885	0.686	0.721	1.199	0.756
Aalti	0.813	0.903	0.892	0.899	0.868	1.048	1.36	0.998
Aaxis	0.708	0.771	0.76	0.788	0.749	0.598	1.207	1.349
Aconf	0.786	0.834	0.799	0.819	0.914	0.823	1.283	1.162
Acris	0.825	0.856	0.858	0.865	0.936	0.96	1.262	1.037
Amela	0.754	0.828	0.799	0.847	0.95	1.102	1.417	1.002
Anebu	0.825	0.866	0.833	0.881	0.903	0.967	1.387	0.996
Aphil	0.869	0.899	0.897	0.894	0.934	1.013	1.326	1.102
Asali	0.853	0.899	0.88	0.901	0.874	0.894	1.251	1.097
Asyri	0.862	0.905	0.895	0.906	0.949	0.987	1.428	0.999
Atria	0.84	0.848	0.822	0.824	0.821	0.602	1.28	1.3
Atris	0.834	0.876	0.859	0.901	0.971	1.047	1.23	0.986
Avirg	0.742	0.813	0.795	0.816	0.919	0.976	1.268	1.062
Bhali	0.872	0.906	0.898	0.909	0.946	0.927	1.311	1.042
Bpapy	0.753	0.842	0.839	0.831	0.921	1.051	1.325	0.997
Cargu	0.821	0.898	0.885	0.891	0.621	0.662	1.349	1.459
Ccana	0.808	0.832	0.826	0.842	0.955	0.998	1.176	0.978
Ccaro	0.751	0.798	0.814	0.819	0.799	0.773	1.144	1.212
Ceryt	0.748	0.758	0.787	0.786	0.769	0.564	0.989	1.101
Cgran	0.732	0.774	0.785	0.788	0.813	0.809	1.166	1.104
Cjuba	0.794	0.854	0.861	0.866	0.739	0.702	1.14	1.37
Corbi	0.868	0.912	0.897	0.912	0.961	1.004	1.402	1.088
Cpers	0.855	0.884	0.88	0.881	1.016	0.94	1.242	1.059
Csell	0.843	0.901	0.893	0.898	0.955	1.046	1.354	1.013
Cseta	0.769	0.832	0.833	0.817	0.912	0.985	1.232	1.036
Csple	0.893	0.728	0.895	0.918	0.981	0.605	1.204	0.992
Ecaly	0.866	0.897	0.86	0.878	0.935	0.887	1.223	1.128
Ecras	0.716	0.831	0.833	0.833	0.927	1.07	1.307	0.998
Enutt	0.861	0.894	0.881	0.902	0.948	1.014	1.147	1.031
Fhete	0.889	0.934	0.933	0.936	0.707	0.776	1.234	1.325
Fimmu	0.715	0.751	0.768	0.755	0.822	0.742	0.992	1.143
Flimo	0.854	0.891	0.878	0.896	0.895	0.946	1.146	1.027
Frust	0.794	0.872	0.852	0.87	0.736	0.881	1.312	1.172
Fspp	0.917	0.937	0.92	0.938	0.986	1.03	1.463	1.003
Fviri	0.74	0.789	0.794	0.785	0.795	0.877	1.203	1.058
Gaffi	0.869	0.899	0.87	0.907	0.972	1.012	1.323	0.991
Gspil	0.798	0.809	0.825	0.841	0.73	0.508	1.132	1.57
Gtinc	0.83	0.876	0.859	0.867	0.93	0.957	1.155	1.12
Hjava	0.788	0.717	0.789	0.805	0.777	0.255	1.056	1.331
Hmant	0.907	0.933	0.913	0.937	0.97	1.024	1.482	1.018
Hpers	0.73	0.798	0.818	0.826	0.446	0.503	1.065	1.391
Hranu	0.773	0.859	0.852	0.861	0.919	1.049	1.14	1.121
Hscan	0.857	0.885	0.878	0.884	0.923	0.976	1.276	1.09
Hseri	0.884	0.908	0.905	0.914	0.842	0.767	1.494	1.439
Hsosn	0.868	0.918	0.912	0.926	0.915	0.995	1.28	1.075
Iglan	0.929	0.948	0.938	0.953	0.979	1.044	1.356	1.026
Kpoly	0.822	0.865	0.863	0.87	0.821	0.813	1.055	1.013
Lamer	0.859	0.884	0.869	0.89	0.934	0.922	1.245	1.092
Lcate	0.823	0.863	0.837	0.875	0.937	1.014	1.354	1
Lcune	0.781	0.852	0.823	0.869	0.92	1.016	1.3	1.098
Lfort	0.498	0.536	0.561	0.525	0.04	0.029	0.211	0.078
Lgetu	0.778	0.823	0.817	0.83	0.839	0.865	1.281	0.988
Lgibb	0.806	0.887	0.854	0.906	0.95	1.064	1.371	1.046
Lgran	0.822	0.862	0.861	0.873	0.917	0.924	1.23	1.049
Ljapo	0.87	0.91	0.89	0.904	0.977	1.001	1.378	1.089
Lmajo	0.849	0.879	0.867	0.872	0.892	0.883	1.1	1.038
Lpepl	0.68	0.808	0.788	0.804	0.803	1.065	1.412	0.998
Mamer	0.874	0.889	0.877	0.883	0.853	0.823	1.075	1.084
Mangu	0.824	0.864	0.836	0.864	0.834	0.866	1.268	1.188
Maqua	0.862	0.893	0.887	0.893	0.977	1.012	1.219	1.035
Mcoyp	0.879	0.918	0.91	0.926	0.965	1.023	1.348	1.016
Mhete	0.746	0.788	0.782	0.81	0.767	0.871	1.206	1.218
Mreev	0.908	0.944	0.946	0.951	0.803	0.936	1.217	1.198
Mvimi	0.859	0.896	0.896	0.897	0.893	0.966	1.332	1.09
Nnasu	0.731	0.756	0.764	0.762	0.768	0.697	1.144	1.102
Nproc	0.846	0.874	0.853	0.894	0.913	0.954	1.374	1.107
Ojama	0.837	0.873	0.859	0.895	0.985	1.08	1.35	0.996
Ozibe	0.846	0.883	0.877	0.893	0.978	1.067	1.135	0.99
Pamer	0.839	0.91	0.892	0.921	0.942	1.075	1.387	1.004
Pcafe	0.822	0.879	0.868	0.887	0.848	1.017	1.342	1.005
Pclar	0.841	0.892	0.883	0.904	0.828	0.917	1.413	1.021
Pglen	0.768	0.827	0.822	0.83	0.73	0.666	1.082	1.21
Physt	0.758	0.819	0.792	0.815	0.933	1.047	1.399	1.026
Pjuli	0.78	0.817	0.796	0.81	0.912	0.879	1.261	1.116
Pleni	0.812	0.866	0.843	0.875	0.92	1.003	1.398	1.003
Ploto	0.78	0.823	0.799	0.85	0.959	1.045	1.199	0.97
Pmano	0.768	0.797	0.888	0.852	0.545	0.407	1.21	1.412
Pmont	0.806	0.856	0.853	0.859	0.944	0.974	1.295	1.101
Pparv	0.853	0.895	0.889	0.912	0.947	0.969	1.398	1.074
Pperf	0.854	0.88	0.868	0.873	0.946	0.961	1.309	1.096
Pstra	0.735	0.79	0.821	0.803	0.921	1.023	1.215	0.997
Scaro	0.867	0.897	0.884	0.909	0.979	1.04	1.266	0.971
Sgemi	0.731	0.814	0.805	0.815	0.791	0.842	1.39	1.122
Smole	0.729	0.792	0.801	0.812	0.776	0.842	1.22	1.132
Snige	0.812	0.853	0.843	0.862	0.95	1.049	1.245	1.05
Srich	0.717	0.73	0.797	0.821	0.224	0.122	0.963	1.785
Taeth	0.831	0.87	0.849	0.893	0.93	0.997	1.454	1.006
Tscri	0.851	0.881	0.881	0.885	1.004	1.093	1.456	0.998
Tsebi	0.846	0.899	0.884	0.902	0.939	0.981	1.271	1.086
Tsibi	0.825	0.845	0.844	0.857	0.905	0.899	1.187	1.16
Vmand	0.876	0.89	0.901	0.908	0.912	0.851	1.329	1.371
Vvelu	0.935	0.957	0.953	0.961	0.941	1.006	1.273	1.094
Wauro	0.741	0.804	0.807	0.807	0.702	0.807	1.161	1.068
Xlaev	0.756	0.81	0.808	0.811	0.828	0.763	1.17	1.19
	GLM	GAM	GBM	BART	GLM	GAM	GBM	BART
AVERAGE	0.81	0.85	0.85	0.86	0.86211	0.885941	1.25124	1.09508
ST DEVIATION	0.07	0.06	0.05	0.06	0.148939	0.202832	0.158334	0.181772

## Sheet: Field description
species ID
AUC	Area Under the receiver operating characteristic Curve
MCS	Miller’s calibration slope
GLM	Generalised Linear Models
GAM	Generalised Additive Models
GBM	Generalised Boosted Models
BART	Bayesian Additive Regression Trees
